# Supplementary material
Source: Royal Society of Chemistry journal article supplement (doi:10.1039/d6cc00561f)
Supplement: d6cc00561f1.pdf [file d6cc00561f1.pdf]

*Electronic Supplementary Information*  
*for*

**Supramolecular colorimetric pressure sensing: ratiometric quantification based on pressure-modulated association**

**Tomoyuki Hamachi,<sup>a</sup> Iori Okamura,<sup>b</sup> Shigehiro Yamaguchi,<sup>c</sup> Masahito Murai<sup>\*c</sup> and Gaku Fukuhara<sup>\*ab</sup>**

<sup>a</sup> Institute for Materials Chemistry and Engineering, Kyushu University, 744 Motoooka, Nishi-ku, Fukuoka 819-0395, Japan.

<sup>b</sup> Department of Chemistry, Institute of Science Tokyo, 2-12-1 Ookayama, Meguro-ku, Tokyo 152-8551 Japan.

<sup>c</sup> Department of Chemistry, Graduate School of Science and Integrated Research Consortium on Chemical Science (IRCCS), Nagoya University, Nagoya 464-8602, Japan.

E-mail: [masahito.murai@chem.nagoya-u.ac.jp](mailto:masahito.murai@chem.nagoya-u.ac.jp) (M.M.), [gaku@ms.ifoc.kyushu-u.ac.jp](mailto:gaku@ms.ifoc.kyushu-u.ac.jp) (G.F.)

## Experimental Section

**Materials.** All commercial reagents and solvents were used as received without further purification. Sample solutions were dissolved in a spectroscopic-grade solvent. The target material (**1**<sub>PF6</sub>) was synthesized as reported previously.<sup>1</sup>

**Instruments.** The UV/vis/NIR spectra were acquired using a JASCO V-770 spectrometer.

**Hydrostatic pressure spectroscopy.** Spectroscopic measurements under hydrostatic pressure were performed using a custom-built high-pressure apparatus as described in detail in our previous publication.<sup>2</sup> In this set-up (Fig. S1), a quartz inner cell (path length of 2 mm) equipped with a Teflon tube was filled with the sample solution. The inner cell was placed within an outer cell containing water, which was hydrostatically pressurized using a hand pump. The entire assembly was mounted in the spectrometers, allowing hydrostatic pressure spectroscopy to be carried out through sapphire windows in the pressure range of 0.1–400 MPa.

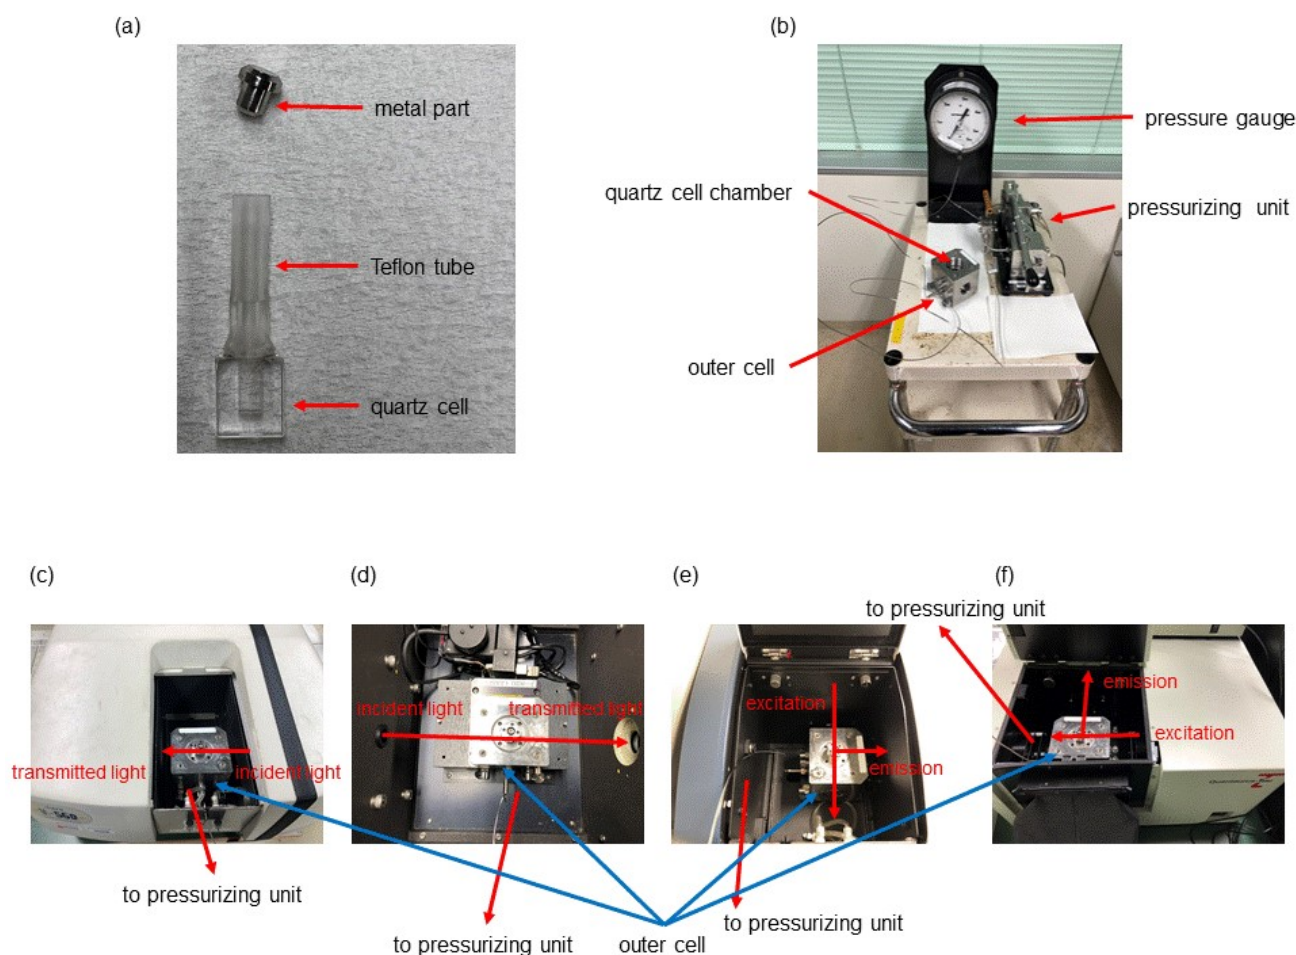

**Fig. S1** Photographs of (a) inner quartz cell, (b) pressurizing unit, and setups for (c) UV/vis, (d) circular dichroism, (e) fluorescence, and (f) lifetime measurements. Reproduced with permission from Ref. 2. Copyright 2020 John Wiley & Sons.

<sup>1</sup> M. Murai, M. Abe, S. Ogi and S. Yamaguchi, *J. Am. Chem. Soc.*, 2022, **144**, 20385–20393.

<sup>2</sup> H. Mizuno, M. Kitamatsu, Y. Imai and G. Fukuhara, *ChemPhotoChem*, 2020, **4**, 502–507.

**Structure optimization.** All quantum chemical calculations were performed using the Gaussian 16 Revision B.01 program suite.<sup>3</sup> Geometry optimizations and property calculations were performed at the M06/6-311+G(d,p) level of theory with solvent effects included using a polarizable continuum model (PCM) for CH<sub>2</sub>Cl<sub>2</sub>. The optimized geometry of **1PF<sub>6</sub>** was confirmed to be at the minimum on the potential energy surface using vibrational frequency analysis which showed no imaginary frequencies. The initial coordinates for a dimer of **1PF<sub>6</sub>** were taken from the crystal packing structure. The Cartesian coordinates used in the calculations are listed in Tables S1 and S2.

---

<sup>3</sup> S1. Frisch, M. J.; Trucks, G. W.; Schlegel, H. B.; Scuseria, G. E.; Robb, M. A.; Cheeseman, J. R.; Scalmani, G.; Barone, V.; Petersson, G. A.; Nakatsuji, H.; Li, X.; Caricato, M.; Marenich, A. V.; Bloino, J.; Janesko, B. G.; Gomperts, R.; Mennucci, B.; Hratchian, H. P.; Ortiz, J. V.; Izmaylov, A. F.; Sonnenberg, J. L.; Williams-Young, D.; Ding, F.; Lipparini, F.; Egidi, F.; Goings, J.; Peng, B.; Petrone, A.; Henderson, T.; Ranasinghe, D.; Zakrzewski, V. G.; Gao, J.; Rega, N.; Zheng, G.; Liang, W.; Hada, M.; Ehara, M.; Toyota, K.; Fukuda, R.; Hasegawa, J.; Ishida, M.; Nakajima, T.; Honda, Y.; Kitao, O.; Nakai, H.; Vreven, T.; Throssell, K.; Montgomery, Jr. J. A.; Peralta, J. E.; Ogliaro, F.; Bearpark, M. J.; Heyd, J. J.; Brothers, E. N.; Kudin, K. N.; Staroverov, V. N.; Keith, T. A.; Kobayashi, R.; Normand, J.; Raghavachari, K.; Rendell, A. P.; Burant, J. C.; Iyengar, S. S.; Tomasi, J.; Cossi, M.; Millam, J. M.; Klene, M.; Adamo, C.; Cammi, R.; Ochterski, J. W.; Martin, R. L.; Morokuma, K.; Farkas, O.; Foresman, J. B.; Fox, D. J. Gaussian 16, Revision B.01; Gaussian Inc. Wallingford, CT, 2016.

**Sample preparation.** Spectroscopic measurements of  $\mathbf{1_{PF6}}$  in mixed 1,2-dichloroethane (DCE) and methylcyclohexane (MCH) were performed using the samples prepared as follows. First, a solution of  $\mathbf{1_{PF6}}$  in DCE was prepared in a vial and another vial containing MCH was prepared. A DCE solution of  $\mathbf{1_{PF6}}$  was then slowly injected into the bottom of the vial containing MCH to form separate layers. Subsequently, the vial was inverted thrice to mix the solvents. The resulting solution was then transferred to a high-pressure cell and spectroscopic measurements were performed as quickly as possible.

**Calculation of the equilibrium constant  $K_{dim}$  for the monomer-dimer equilibrium of  $\mathbf{1}_{PF6}$ .** In the present study, the monomer-dimer equilibrium of  $\mathbf{1}_{PF6}$  was assumed to be the primary factor responsible for the observed changes in the absorption spectra. The absorption maximum of  $\mathbf{1}_{PF6}$  observed in the DCE/MCH mixed solvent (approximately 800 nm) was close to that observed for crystalline  $\mathbf{1}_{PF6}$ ,<sup>4</sup> suggesting that similar associated species were formed in both states. Furthermore, crystal structure analysis revealed that the two nearest-neighbor molecules formed a closely associated dimer, whereas the spatial separation between individual dimers was somewhat larger, indicating that the inter-dimer interactions were relatively weak. Based on these observations, the absorption peak at approximately 800 nm is considered to originate predominantly from the dimer species, even though higher-order aggregates may be present in the solution. Accordingly, the absorption behavior of the present system is assumed to be approximately described in terms of the monomer-dimer equilibrium, and the discussion in this study is based on this assumption.

Based on this assumption, in the following fitting analysis,  $\mathbf{1}_{PF6}$  was assumed to exist as a monomer in DCE solution (Fig. 2a in the main text), whereas it exists mainly as a dimer in the DCE/MCH = 1/9 (v/v) mixed solvent (Fig. S2). Because the absorption spectrum of the dimer overlaps that of the monomer in mixed solvents, the contribution of the dimer absorption peak (at approximately 800 nm) to the apparent monomer absorption peak (at approximately 650 nm) was estimated using the spectrum measured in the DCE/MCH = 1/9 solution. From the averaged absorption spectra at each pressure of  $\mathbf{1}_{PF6}$  in the DCE/MCH = 1/9 (v/v) mixed solvent, the ratio ( $R_{M/D}$ ) of the monomer absorption intensity ( $I_{650}$ ) of the peak at approximately 650 nm to the dimer absorption intensity ( $I_{800}$ ) of the peak at approximately 800 nm was determined using Equation S1.

$$R_{M/D} = \frac{I_{650}}{I_{800}} \#(S1)$$

The actual monomer absorption intensity ( $I_M$ ) was calculated from the apparent monomer absorption intensity ( $I_{M,app}$ ) and the dimer absorption intensity ( $I_D$ ) for each mixed solvent composition according to Equation S2:

$$I_M = I_{M,app} - R_{M/D}I_D \#(S2)$$

The concentration of the monomer ( $C_M$ ) was determined using the molar absorption coefficient of  $\mathbf{1}_{PF6}$  in the DCE solution (Figure S2), whereas the concentration of the dimer ( $C_D$ ) was calculated from the prepared concentration ( $C_0$ ) according to Equation S3.

$$C_D = \frac{C_0 - C_M}{2} \#(S3)$$

Finally, the equilibrium constant was calculated using equation S4.

$$K_{dim} = \frac{C_D}{C_M^2} \#(S4)$$

---

<sup>4</sup> M. Murai, M. Abe, S. Ogi and S. Yamaguchi, *J. Am. Chem. Soc.*, 2022, **144**, 20385–20393.

## Absorption of $1_{PF6}$ dimer

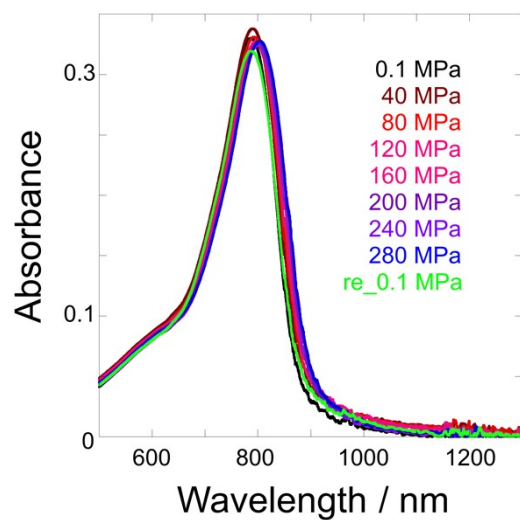

**Figure S2.** UV/vis spectra of  $1_{PF6}$  in DCE/MCH = 1/9 (v/v) (50  $\mu$ M) at 0.1, 40, 80, 120, 160, 200, 240, and 280 MPa (from black to blue) at room temperature, measured in a high-pressure cell. The green line indicates the spectrum obtained at 0.1 MPa after depressurization from 280 MPa.

### Full absorption spectra of $1_{\text{PF6}}$ .

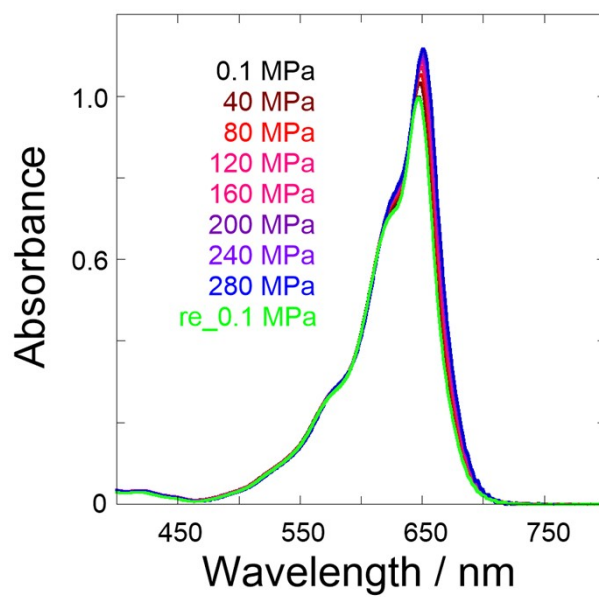

**Figure S3.** Full absorption spectra of  $1_{\text{PF6}}$  in DCE (39  $\mu\text{M}$ ) at 0.1, 40, 80, 120, 160, 200, 240, and 280 MPa (from black to blue) at room temperature, measured in a high-pressure cell. The green line indicates the spectrum at 0.1 MPa after depressurization from 280 MPa.

Expanded views of the absorption peak maxima of  $1_{PF6}$ .

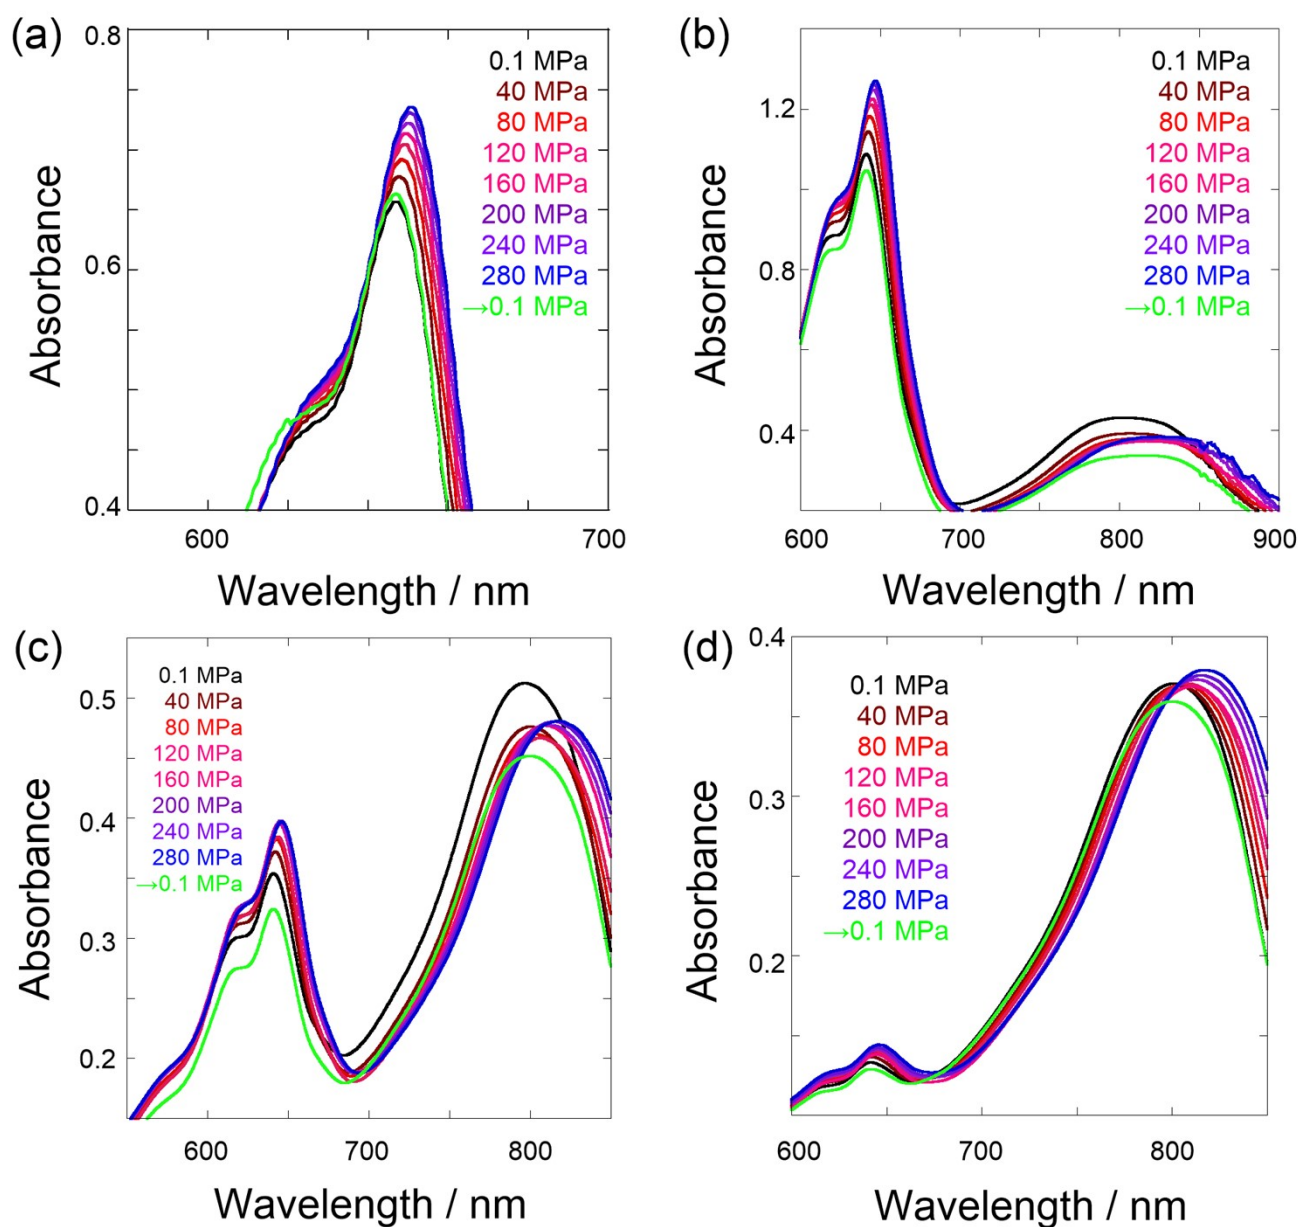

**Figure S4.** Expanded views of the absorption peak maxima of  $1_{PF6}$  in (a) DCE (39  $\mu$ M), (b) DCE/MCH = 4/6 (v/v) (200  $\mu$ M), (c) DCE/MCH = 3/7 (v/v) (100  $\mu$ M), and (d) DCE/MCH = 2/8 (v/v) (50  $\mu$ M) at 0.1, 40, 80, 120, 160, 200, 240, and 280 MPa (from black to blue) at room temperature, measured in a high-pressure cell. The green line indicates the spectrum at 0.1 MPa after depressurization from 280 MPa.

Reproducibility measurements for determining the pressure-dependent  $K_{\text{dim}}$

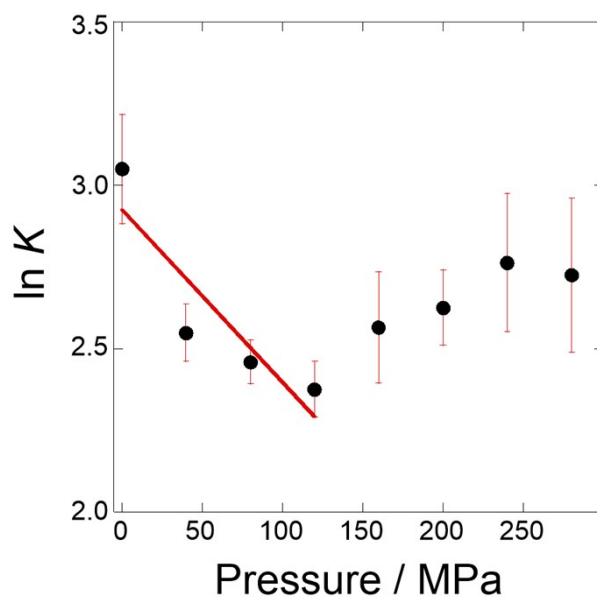

**Figure S5.** Pressure dependence of  $K_{\text{dim}}$  for the monomer-dimer equilibrium of  $\mathbf{1}_{\text{PF}_6}$  in DCE/MCH = 2/8 (v/v) (50  $\mu\text{M}$ ) at 0.1, 40, 80, 120, 160, 200, 240, and 280 MPa at room temperature, measured in a high-pressure cell, with mean values and standard errors obtained from three independent measurements (Fig. 2a, S6, and S7).

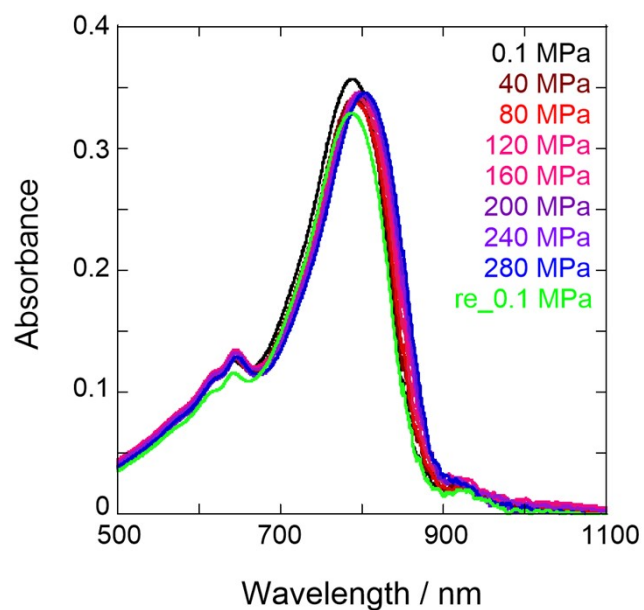

**Figure S6.** UV/vis/NIR absorption spectra of  $1_{PF6}$  in DCE/MCH = 2/8 (v/v) (50  $\mu\text{M}$ ) at 0.1, 40, 80, 120, 160, 200, 240, and 280 MPa (from black to blue) at room temperature, measured in a high-pressure cell. The green line indicates the spectrum at 0.1 MPa depressurized from 280 MPa (run2).

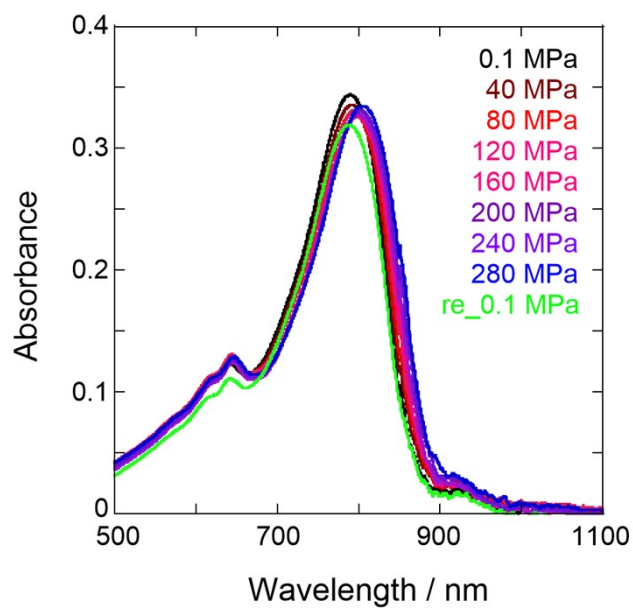

**Figure S7.** UV/vis/NIR absorption spectra of  $1_{PF6}$  in DCE/MCH = 2/8 (v/v) (50  $\mu$ M) at 0.1, 40, 80, 120, 160, 200, 240, and 280 MPa (from black to blue) at room temperature, measured in a high-pressure cell. The green line indicates the spectrum at 0.1 MPa depressurized from 280 MPa (run3).

## Pressure dependence of the frequencies of absorption maxima

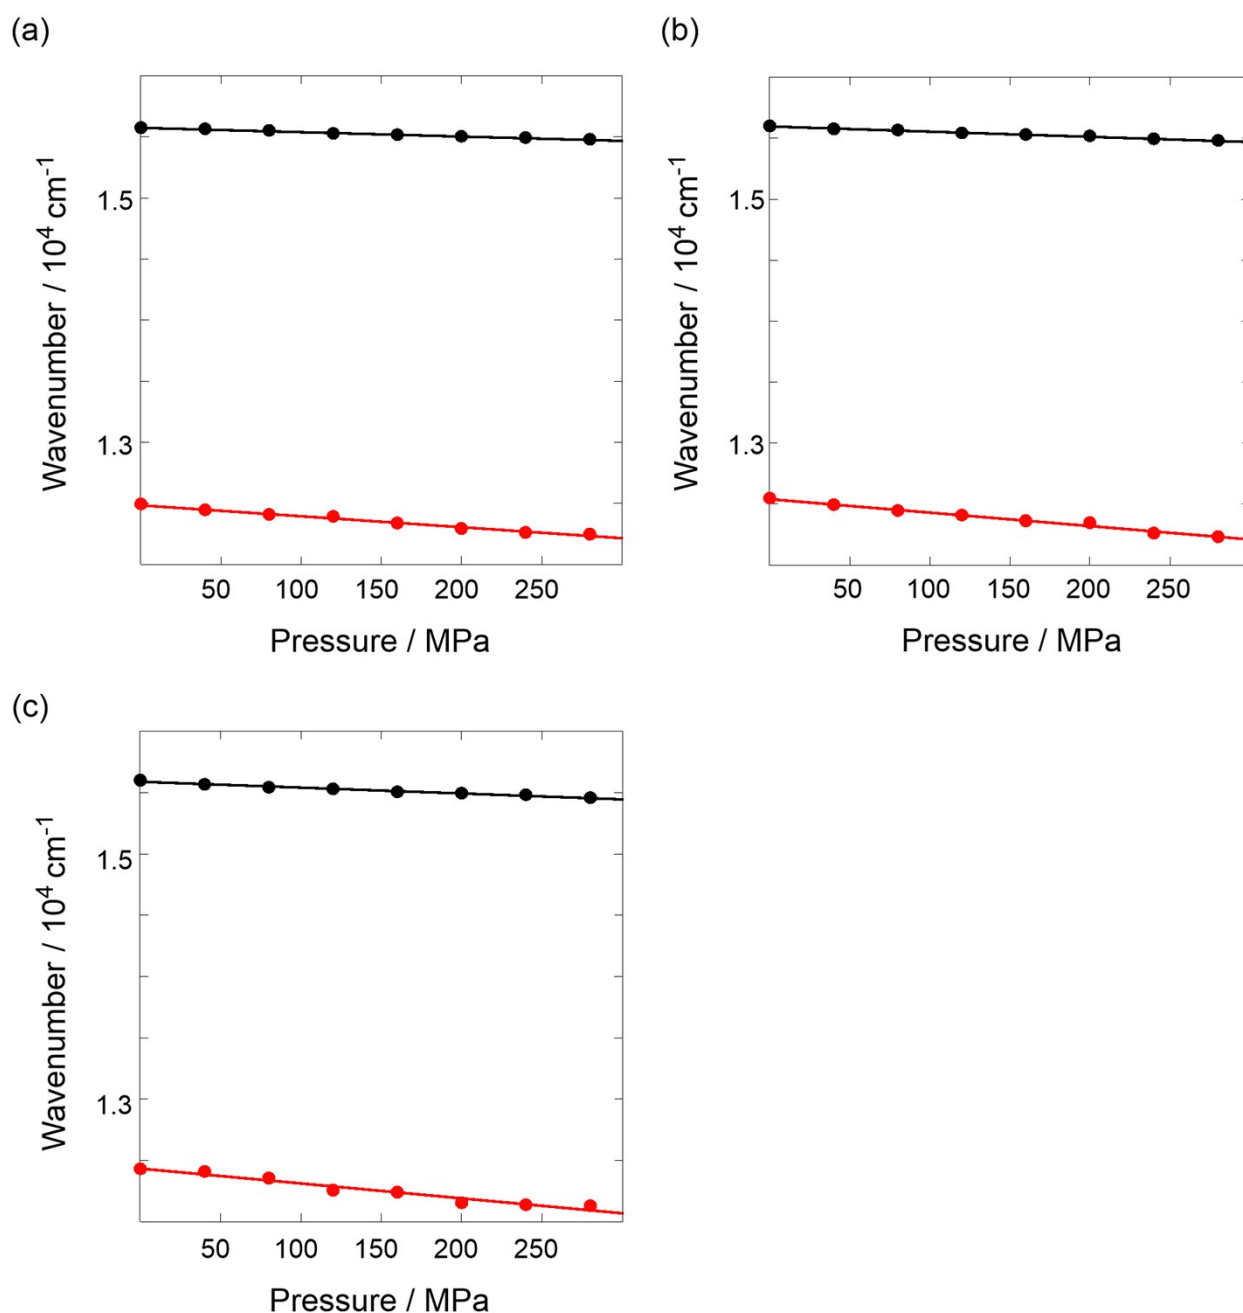

**Figure S8.** Plots of the frequencies of absorption maxima of  $1_{\text{PF}_6}$  at different pressures in (a) DCE/MCH = 2/8 (v/v) (50  $\mu\text{M}$ ), (b) DCE/MCH = 3/7 (v/v) (100  $\mu\text{M}$ ), and (c) DCE/MCH = 4/6 (v/v) (200  $\mu\text{M}$ ). Regression lines for the monomer and dimer are shown by black lines ((a) slope =  $-0.355 \text{ cm}^{-1} \text{ MPa}^{-1}$ ,  $r = 0.995$ , (b) slope =  $-0.424 \text{ cm}^{-1} \text{ MPa}^{-1}$ ,  $r = 0.996$ , and (c) slope =  $-0.477 \text{ cm}^{-1} \text{ MPa}^{-1}$ ,  $r = 0.988$ ) and red lines ((a) slope =  $-0.901 \text{ cm}^{-1} \text{ MPa}^{-1}$ ,  $r = 0.993$ , (b) slope =  $-1.10 \text{ cm}^{-1} \text{ MPa}^{-1}$ ,  $r = 0.994$ , and (c) slope =  $-1.22 \text{ cm}^{-1} \text{ MPa}^{-1}$ ,  $r = 0.977$ ), respectively.

**Table S1. Cartesian coordinates (Å) of the optimized structure of 1<sub>PF6</sub> monomer calculated by DFT at the M06/6-311+G(d,p) level of theory with PCM (CH<sub>2</sub>Cl<sub>2</sub>).**

| Label | Element | x        | y        | Z        | Label | Element | x        | y        | z        |
|-------|---------|----------|----------|----------|-------|---------|----------|----------|----------|
| 1     | C       | 2.322336 | 3.299974 | 0.140517 | 38    | H       | 5.853646 | 0.245781 | -1.04197 |
| 2     | H       | 3.164814 | 3.959407 | 0.322326 | 39    | C       | 4.609354 | 0.899479 | 1.924892 |
| 3     | C       | 2.360584 | 1.926015 | 0.068279 | 40    | H       | 5.402337 | 0.151957 | 2.036912 |
| 4     | C       | 1.02544  | 1.45344  | -0.18279 | 41    | H       | 3.88253  | 0.754533 | 2.729093 |
| 5     | C       | 0.15591  | 2.591497 | -0.26601 | 42    | H       | 5.059551 | 1.891502 | 2.040503 |
| 6     | C       | -1.20763 | 2.552835 | -0.50441 | 43    | Si      | 3.806039 | 0.744086 | 0.247222 |
| 7     | H       | -1.6444  | 1.568783 | -0.66137 | 44    | P       | -3.59347 | -0.68789 | 0.279737 |
| 8     | C       | -2.10288 | 3.61457  | -0.57565 | 45    | F       | -2.34285 | -0.41342 | 1.288982 |
| 9     | H       | -3.13672 | 3.336172 | -0.76058 | 46    | F       | -4.81393 | -0.9574  | -0.75182 |
| 10    | C       | -1.85718 | 4.974493 | -0.43999 | 47    | F       | -3.25672 | -2.27984 | 0.302849 |
| 11    | H       | -2.72985 | 5.615953 | -0.53622 | 48    | F       | -2.56531 | -0.50638 | -0.99222 |
| 12    | C       | -0.6567  | 5.636405 | -0.20101 | 49    | F       | -3.90261 | 0.908644 | 0.234829 |
| 13    | H       | -0.72015 | 6.719404 | -0.13866 | 50    | F       | -4.59203 | -0.86344 | 1.540773 |
| 14    | C       | 0.608876 | 5.095785 | -0.03116 |       |         |          |          |          |
| 15    | H       | 1.414318 | 5.806733 | 0.146363 |       |         |          |          |          |
| 16    | C       | 0.990019 | 3.760396 | -0.05314 |       |         |          |          |          |
| 17    | C       | 3.41044  | -2.18378 | 0.124231 |       |         |          |          |          |
| 18    | H       | 4.442896 | -2.4722  | 0.293163 |       |         |          |          |          |
| 19    | C       | 2.920233 | -0.89899 | 0.063589 |       |         |          |          |          |
| 20    | C       | 1.504022 | -0.97077 | -0.17623 |       |         |          |          |          |
| 21    | C       | 1.132709 | -2.35393 | -0.25567 |       |         |          |          |          |
| 22    | C       | -0.14763 | -2.83883 | -0.4633  |       |         |          |          |          |
| 23    | H       | -0.93618 | -2.09953 | -0.5861  |       |         |          |          |          |
| 24    | C       | -0.57025 | -4.16181 | -0.53297 |       |         |          |          |          |
| 25    | H       | -1.63671 | -4.29788 | -0.69079 |       |         |          |          |          |
| 26    | C       | 0.179804 | -5.32546 | -0.42681 |       |         |          |          |          |
| 27    | H       | -0.38313 | -6.25111 | -0.51947 |       |         |          |          |          |
| 28    | C       | 1.546763 | -5.47933 | -0.21756 |       |         |          |          |          |
| 29    | H       | 1.904219 | -6.50454 | -0.17231 |       |         |          |          |          |
| 30    | C       | 2.511615 | -4.49686 | -0.05437 |       |         |          |          |          |
| 31    | H       | 3.53036  | -4.8471  | 0.104514 |       |         |          |          |          |
| 32    | C       | 2.353028 | -3.11699 | -0.06329 |       |         |          |          |          |
| 33    | C       | 0.641872 | 0.118098 | -0.29454 |       |         |          |          |          |
| 34    | H       | -0.41064 | -0.09076 | -0.47666 |       |         |          |          |          |
| 35    | C       | 5.055733 | 0.992617 | -1.1179  |       |         |          |          |          |
| 36    | H       | 5.511622 | 1.985676 | -1.04066 |       |         |          |          |          |
| 37    | H       | 4.591268 | 0.901778 | -2.10393 |       |         |          |          |          |

**Table S2. Cartesian coordinates (Å) of the structure of 1<sub>PF6</sub> dimer taken from the crystal packing structure.**

| Label | Element | x        | Y        | z        | Label | Element | x        | y        | z        |
|-------|---------|----------|----------|----------|-------|---------|----------|----------|----------|
| 1     | Si      | 4.062756 | 3.806826 | 0.137275 | 38    | C       | 8.885959 | 1.329105 | 0.252767 |
| 2     | C       | 5.484017 | 2.601117 | 0.329462 | 39    | H       | 9.408571 | 2.121089 | 0.212881 |
| 3     | C       | 0.660749 | 1.943799 | 1.565709 | 40    | C       | -1.11166 | -0.45837 | 2.45933  |
| 4     | C       | 2.674341 | 2.758575 | 0.819991 | 41    | H       | -1.81254 | -1.0373  | 2.736115 |
| 5     | C       | 5.231186 | 1.190786 | 0.534819 | 42    | C       | 9.114674 | -1.16258 | 0.303128 |
| 6     | C       | 6.483543 | 0.491327 | 0.494396 | 43    | H       | 9.77231  | -1.84316 | 0.222363 |
| 7     | C       | 2.818697 | 1.336356 | 1.000038 | 44    | P       | 3.608697 | -3.45118 | -0.79233 |
| 8     | C       | 0.096907 | -1.0846  | 2.177781 | 45    | F       | 3.743555 | -1.94808 | -1.33239 |
| 9     | H       | 0.110936 | -2.02634 | 2.301912 | 46    | F       | 3.493348 | -4.93259 | -0.23219 |
| 10    | C       | 3.994807 | 0.613138 | 0.817192 | 47    | F       | 5.196187 | -3.53438 | -0.70635 |
| 11    | H       | 3.951299 | -0.33343 | 0.889363 | 48    | F       | 3.571923 | -2.87697 | 0.686977 |
| 12    | C       | 1.559819 | 0.801067 | 1.459275 | 49    | F       | 2.03322  | -3.34763 | -0.87622 |
| 13    | C       | -0.66423 | 1.953414 | 1.987129 | 50    | F       | 3.678637 | -4.00439 | -2.27171 |
| 14    | H       | -1.09004 | 2.802862 | 1.995895 | 51    | Si      | -4.31844 | 3.838221 | -0.41864 |
| 15    | C       | 6.847541 | 2.764657 | 0.221237 | 52    | C       | -2.89958 | 1.35091  | -0.77297 |
| 16    | H       | 7.285621 | 3.598627 | 0.098079 | 53    | C       | -1.62269 | 0.826206 | -1.15898 |
| 17    | C       | 7.506119 | 1.511095 | 0.317927 | 54    | C       | -7.00914 | 2.627359 | -0.19288 |
| 18    | C       | 6.646383 | -0.87841 | 0.580568 | 55    | H       | -7.49601 | 3.443068 | -0.19012 |
| 19    | H       | 5.855067 | -1.37994 | 0.736824 | 56    | C       | -5.30039 | 1.133136 | -0.26937 |
| 20    | C       | -1.44478 | 0.88155  | 2.397904 | 57    | C       | -6.50787 | 0.374135 | -0.12672 |
| 21    | H       | -2.32765 | 1.098717 | 2.673159 | 58    | C       | -6.58938 | -1.00093 | -0.06201 |
| 22    | C       | 3.740918 | 4.114343 | -1.671   | 59    | H       | -5.76702 | -1.4694  | -0.14398 |
| 23    | H       | 4.504255 | 4.587623 | -2.06288 | 60    | C       | -2.86392 | 2.779255 | -0.90627 |
| 24    | H       | 3.616664 | 3.257647 | -2.13088 | 61    | C       | -5.63905 | 2.530821 | -0.29828 |
| 25    | H       | 2.932331 | 4.658777 | -1.77101 | 62    | C       | -4.02357 | 0.59808  | -0.4483  |
| 26    | C       | 1.295051 | -0.51513 | 1.735083 | 63    | H       | -3.9152  | -0.3397  | -0.3422  |
| 27    | H       | 2.01881  | -1.11753 | 1.609536 | 64    | C       | -1.62208 | 3.12815  | -1.36178 |
| 28    | C       | 1.381182 | 3.096782 | 1.158589 | 65    | H       | -1.33474 | 4.018242 | -1.53078 |
| 29    | H       | 1.023272 | 3.975739 | 1.125086 | 66    | C       | -1.25792 | -0.50145 | -1.14744 |
| 30    | C       | 7.820526 | -1.61562 | 0.469174 | 67    | H       | -1.91547 | -1.10919 | -0.82944 |
| 31    | H       | 7.717957 | -2.55936 | 0.513252 | 68    | C       | 0.48156  | 1.984405 | -2.02854 |
| 32    | C       | 4.2296   | 5.424191 | 1.011436 | 69    | H       | 0.844601 | 2.840369 | -2.22157 |
| 33    | H       | 3.461259 | 5.992705 | 0.795425 | 70    | C       | 1.311459 | 0.908117 | -2.25956 |
| 34    | H       | 4.260328 | 5.270447 | 1.979046 | 71    | H       | 2.166493 | 1.120067 | -2.61366 |
| 35    | H       | 5.055092 | 5.866849 | 0.724586 | 72    | C       | -8.95663 | 1.092145 | 0.041165 |
| 36    | C       | 9.59768  | 0.125903 | 0.237641 | 73    | H       | -9.51928 | 1.857318 | 0.03061  |
| 37    | H       | 10.54174 | 0.207551 | 0.174056 | 74    | C       | -0.0546  | -1.06414 | -1.53902 |

| Label | Element | x        | y        | z        |
|-------|---------|----------|----------|----------|
| 75    | H       | 0.006365 | -2.00774 | -1.44868 |
| 76    | C       | -7.7184  | -1.78424 | 0.106483 |
| 77    | H       | -7.56438 | -2.72043 | 0.149808 |
| 78    | C       | -7.59131 | 1.339267 | -0.08813 |
| 79    | C       | -0.82536 | 1.967876 | -1.54557 |
| 80    | C       | -9.04335 | -1.39019 | 0.222301 |
| 81    | H       | -9.66607 | -2.09637 | 0.346698 |
| 82    | C       | -9.59186 | -0.11892 | 0.180338 |
| 83    | H       | -10.5377 | -0.07826 | 0.260789 |
| 84    | C       | 1.073101 | -0.43787 | -2.04712 |
| 85    | H       | 1.7871   | -1.01775 | -2.28321 |
| 86    | C       | -3.97638 | 4.547368 | 1.261113 |
| 87    | H       | -3.23907 | 5.189754 | 1.201185 |
| 88    | H       | -3.73135 | 3.825208 | 1.877177 |
| 89    | H       | -4.77896 | 5.001393 | 1.593902 |
| 90    | C       | -4.68868 | 5.128939 | -1.67568 |
| 91    | H       | -4.85758 | 4.702177 | -2.542   |
| 92    | H       | -3.92425 | 5.736798 | -1.75499 |
| 93    | H       | -5.48156 | 5.63482  | -1.4011  |
| 94    | P       | -3.34294 | -3.69965 | 0.44101  |
| 95    | F       | -2.96899 | -5.08179 | -0.25362 |
| 96    | F       | -3.7086  | -2.29908 | 1.128826 |
| 97    | F       | -4.88856 | -4.05678 | 0.360428 |
| 98    | F       | -1.81108 | -3.31644 | 0.501984 |
| 99    | F       | -3.46394 | -2.98402 | -0.97502 |
| 100   | F       | -3.24968 | -4.38292 | 1.855231 |
